# Supplementary material for: Pilot Study for Immunogenicity of SARS-CoV-2 Vaccine with Seasonal Influenza and Pertussis Vaccines in Pregnant Women
Source: MDPI journal article supplement (doi:10.3390/vaccines11010119), 2023-01-03
Supplement: s1 [file s1]

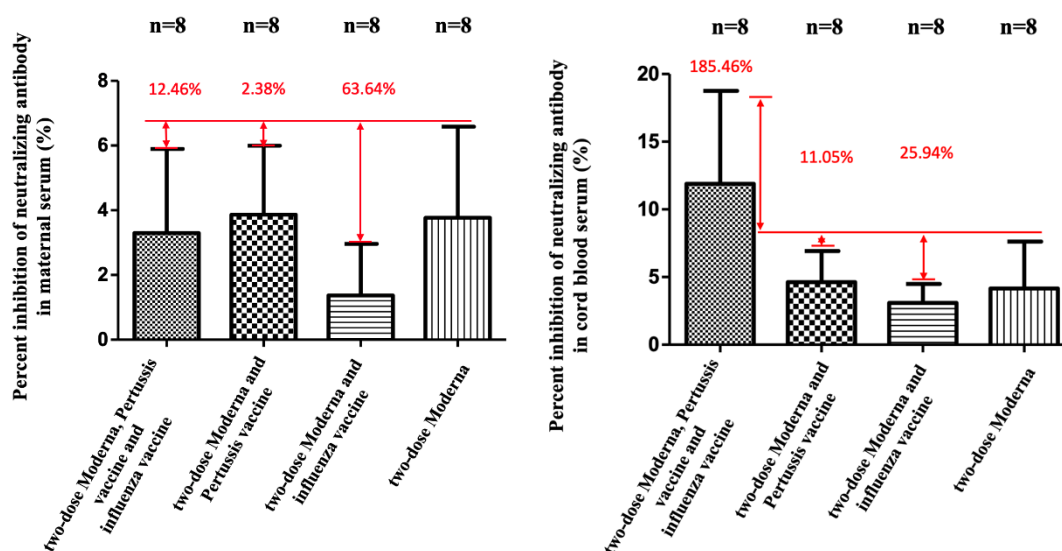

**Figure S1.** The percentage of inhibition of neutralizing antibody (%) against the Omicron variant in maternal and cord blood.

**Table S1.** Concentration(Unit) of Anti-SARS-CoV-2 total antibody in maternal blood.

|                                                |       |       |       |       |       |       |           |
|------------------------------------------------|-------|-------|-------|-------|-------|-------|-----------|
| <b>3 Moderna +<br/>Tdap + Flu<br/>(n=7)</b>    | >2500 | >2500 | >2500 | >2500 | >2500 | 1688  | >2500     |
| <b>2AZ+1 Moderna<br/>+ Tdap +Flu<br/>(n=6)</b> | >2500 | >2500 | >2500 | 1802  | 1095  | 2137  |           |
| <b>2 Moderna +<br/>Tdap + Flu<br/>(n=8)</b>    | >2500 | 984.9 | 1900  | 771.6 | 1079  | >2500 | 1177 1095 |

**Table S2.** Concentration(Unit) of Anti-SARS-CoV-2 total antibody in cord blood.

|                                                |       |       |       |       |       |       |           |
|------------------------------------------------|-------|-------|-------|-------|-------|-------|-----------|
| <b>3 Moderna +<br/>Tdap + Flu(<br/>n=7)</b>    | >2500 | 2346  | >2500 | >2500 | >2500 | 2495  | >2500     |
| <b>2AZ+1 Moderna<br/>+ Tdap +Flu<br/>(n=6)</b> | >2500 | >2500 | >2500 | >2500 | 2417  | >2500 |           |
| <b>2 Moderna +<br/>Tdap + Flu<br/>(n=8)</b>    | >2500 | >2500 | >2500 | 825.6 | 1519  | >2500 | 1817 1612 |
